# Supplementary material for: Maintenance of PARP Inhibitor Rechallenge Plus Bevacizumab in Patients with Platinum-Sensitive, Recurrent Ovarian Cancer Previously Treated with a PARP Inhibitor (KGOG 3056/NIRVANA-R)
Source: Research Square preprint supplement (doi:10.21203/rs.3.rs-6280645/v1), 2025-04-16
Supplement: Supplementary file 1 [file fa6618511c2de880e4d3e752.docx]

***Supplementary materials***

**eFigure 1. Flowchart Showing the Patient Enrollment Criteria.**

**eFigure 2. KM curve according to subgroups**

e**Table 1.** **Incidence of Treatment-Related Adverse Events**

**eFigure 1. Flowchart Showing the Patient Enrollment Criteria.**

**
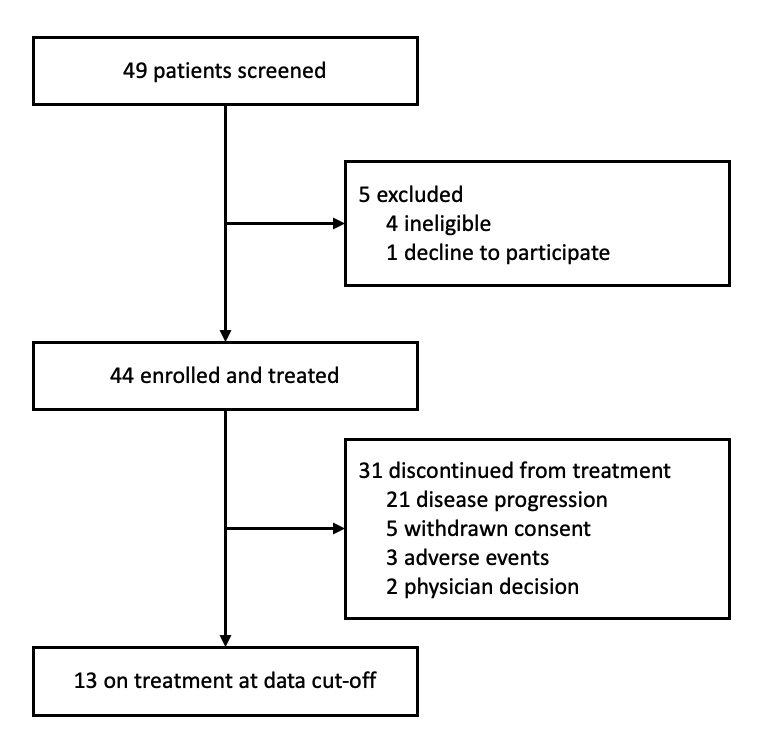
**

**eFigure 2. KM curve according to subgroups**


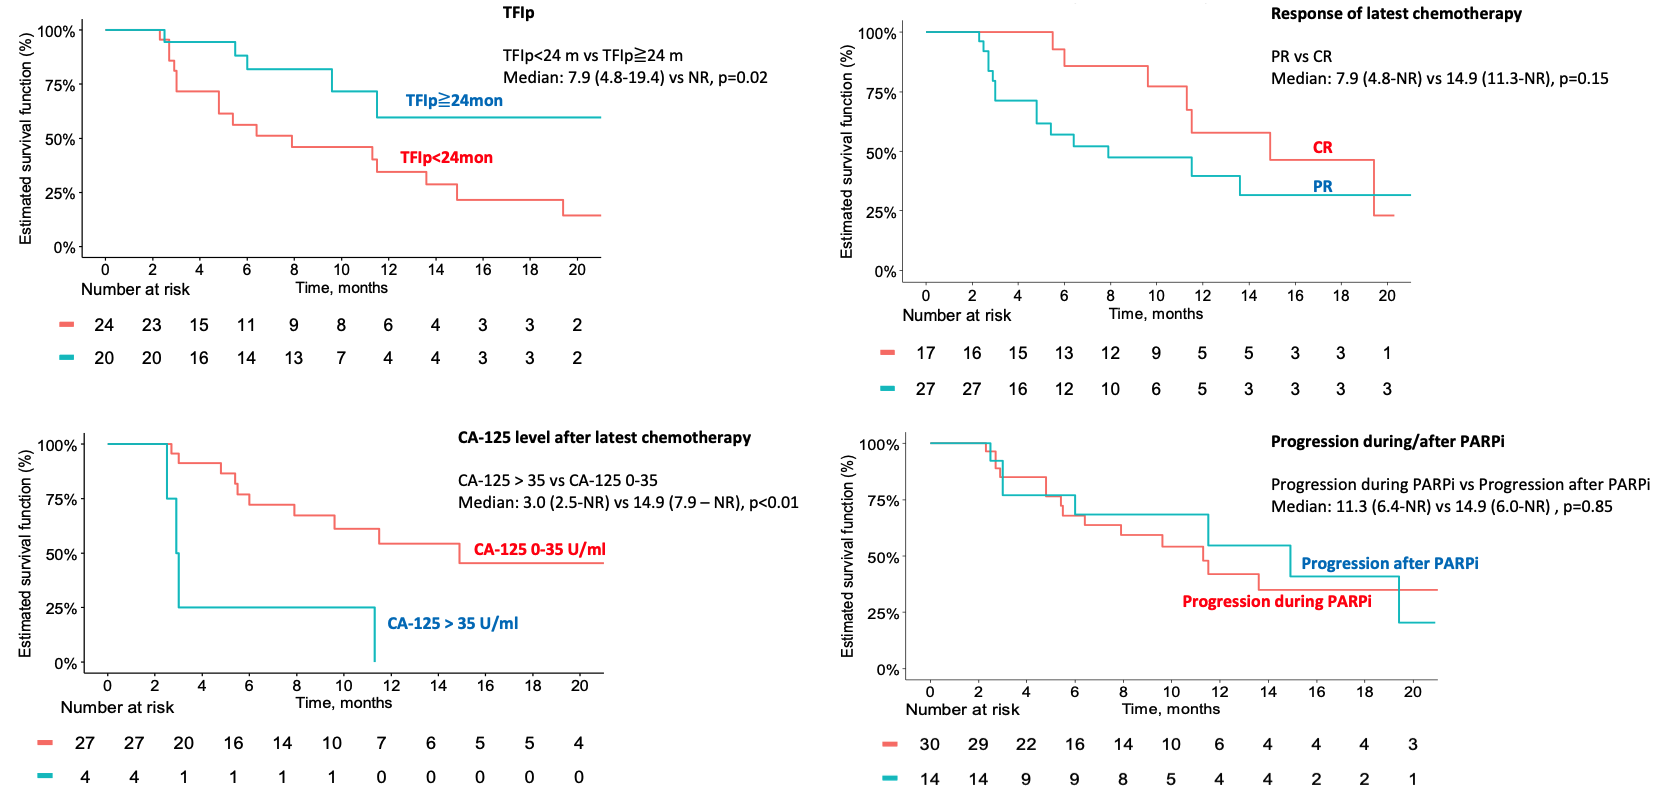


**eTable 1. Incidence of Treatment-Related Adverse Events**

|  | **TRAE in overall population (N=40)** | | | | | | | |
| --- | --- | --- | --- | --- | --- | --- | --- | --- |
|  | **Any TRAE** | |  | **Related to niraparib** | |  | **Related to bevacizumab** | |
|  | **Any** | **Grade ≧ 3** |  | **Any** | **Grade ≧ 3** |  | **Any** | **Grade ≧ 3** |
| Any | 40 (90·9%) | 12 (27·3%) |  | 36 (81·8%) | 12 (27·3%) |  | 29 (65·9%) | 6 (13·6%) |
| Anemia | 8 (18·2%) | 6 (13·6%) |  | 8 (18·2%) | 6 (13·6%) |  | 5 (11·4%) | 2 (4·6%) |
| Thrombocytopenia | 13 (29·6%) | 2 (4·6%) |  | 12 (27·3%) | 1 (2·3%) |  | 8 (18·1%) | 1 (2·3%) |
| Neutropenia | 8 (18·2%) | 6 (13·6%) |  | 7 (15·9%) | 6 (13·6%) |  | 2 (4·6%) | 2 (4·6%) |
| Hypertension | 9 (20·5%) | 1 (2·3%) |  | 3 (6·8%) | 0 |  | 9 (20·5%) | 1 (2·3%) |
| Proteinuria | 5 (11·4%) | 0 |  | 0 | 0 |  | 5 (11·4%) | 0 |
| Fatigue | 5 (11·4%) | 0 |  | 5 (11·4%) | 0 |  | 4 (9·1%) | 0 |
| Headache | 3 (6·8%) | 0 |  | 0 | 0 |  | 3 (6·8%) | 0 |
| Nausea | 4 (9·1%) | 0 |  | 4 (9·2%) | 0 |  | 1 (2·3%) | 0 |
| Vomiting | 1 (2·3%) | 0 |  | 1 (2·3%) | 0 |  | 1 (2·3%) | 0 |
| Diarrhea | 1 (2·3%) | 0 |  | 1 (2·3%) | 0 |  | 0 | 0 |
| Elevated AST/ALT | 5 (11·4%) | 0 |  | 5 (11·4%) | 0 |  | 4 (9·1%) | 0 |
| Acute kidney injury | 2 (4·6%) | 0 |  | 1 (2·3%) | 0 |  | 2 (4·6%) | 0 |
| Hyperkalemia | 2 (4·6%) | 0 |  | 2 (4·6%) | 0 |  | 2 (4·6%) | 0 |
| UTI | 2 (4·6%) | 0 |  | 2 (4·6%) | 0 |  | 2 (4·6%) | 0 |
| Arthralgia | 3 (6·8%) | 0 |  | 1 (2·3%) | 0 |  | 3 (6·8%) | 0 |
| Insomnia | 3 (6·8%) | 0 |  | 3 (6·8%) | 0 |  | 1 (2·3%) | 0 |

**TRAE**=Treatment-Related Adverse Event. **AST**=Aspartate Aminotransferase. **ALT**=Alanine Aminotransferase. **UTI=**Urinary Tract Infectio
